# Supplementary material for: Synthesis and characterisation of organometallic imidazolium compounds that include a new organometallic ionic liquid
Source: Royal Society of Chemistry journal article supplement (doi:10.1039/b308252k), 2003-01-01
Supplement: b308252k.doc [file b308252k.doc]

**Supplementary** **data**

Synthesis and characterisation of organometallic imidazolium compounds that include a new organometallic ionic liquid

Herwig Schottenberger,**a* Klaus Wurst,*a* Ulrike E. I. Horvath,*b*  Stephanie Cronje,**b* Josef Lukasser,*a* Johann Polin,*a* Jean M. McKenzie*b* and Helgard G. Raubenheimer**b*

*a Institut für Allgemeine, Anorganische und Theoretische Chemie, Leopold Franzens Universität, Innrain 52a, A-6020 Innsbruck, Austria. Fax: +43 512 507 2934; Tel: +43 512 507 5120; E-mail: herwig.schottenberger@uibk.ac.at*

*b Department of Chemistry, University of Stellenbosch, Private Bag X1, Matieland, 7602, Stellenbosch, South Africa. Fax: +27 21 8083849; Tel:+27 21 808 2180; E-mail:* [*scron@sun.ac.za*](mailto:scron@sun.ac.za)

| Compound | mp/°C |
| --- | --- |
| **1c** | 86 - 88 |
| **2a** | 65 - 66 |
| **4b** | 75 - 77 |

**Table 1** Ionic liquids and their melting points
